# Supplementary material for: Osmolarity‐Induced Altered Intracellular Molecular Crowding Drives Osteoarthritis Pathology
Source: PubMed Central journal article supplement (PMC10953583; doi:10.1002/advs.202306722), 2024-01-11
Supplement: ADVS-11-2306722-s006.pdf [file ADVS-11-2306722-s006.pdf]

## Supporting Information

for *Adv. Sci.*, DOI 10.1002/advs.202306722

Osmolarity-Induced Altered Intracellular Molecular Crowding Drives Osteoarthritis Pathology

*Kannan Govindaraj, Marieke Meteling, Jeroen van Rooij, Malin Becker, Andre J. van Wijnen, Jeroen J. J. P. van den Beucken, Yolande F. M. Ramos, Joyce van Meurs, Janine N. Post and Jeroen Leijten\**

Supplementary Materials for  
**Osmolarity-induced altered intracellular molecular crowding drives  
osteoarthritis pathology**

Kannan Govindaraj *et al.*

\*Corresponding author. Email: jeroen.leijten@utwente.nl

**This PDF file includes:**

Figs. S1 to S7  
Tables S1 to S5

**Other Supplementary Materials for this manuscript include the following:**

Data S1 to S6

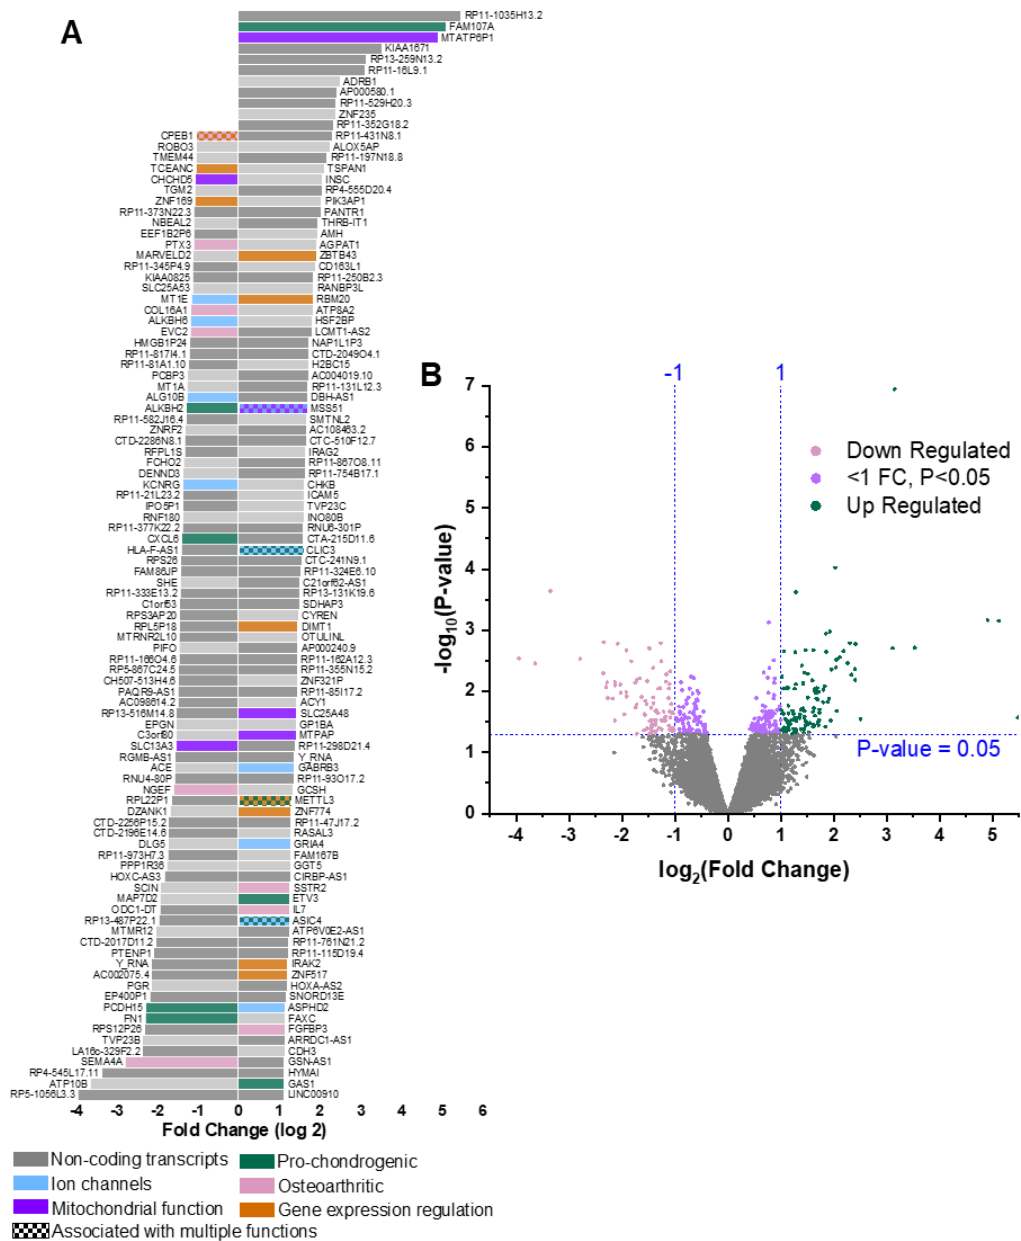

**Fig. S1.**

DEGs in OA hPCs that were exposed to healthy-like osmolarity. **(A)** Stacked-bar graph shows top-100 down and up-regulated genes in OA hPCs exposed to healthy-like osmolarity as compared to OA-like osmolarity. **(B)**, volcano plot shows down (red), up (green) and significantly differently expressed (but <1 fold, purple) genes in OA hPCs exposed to healthy-like osmolarity.

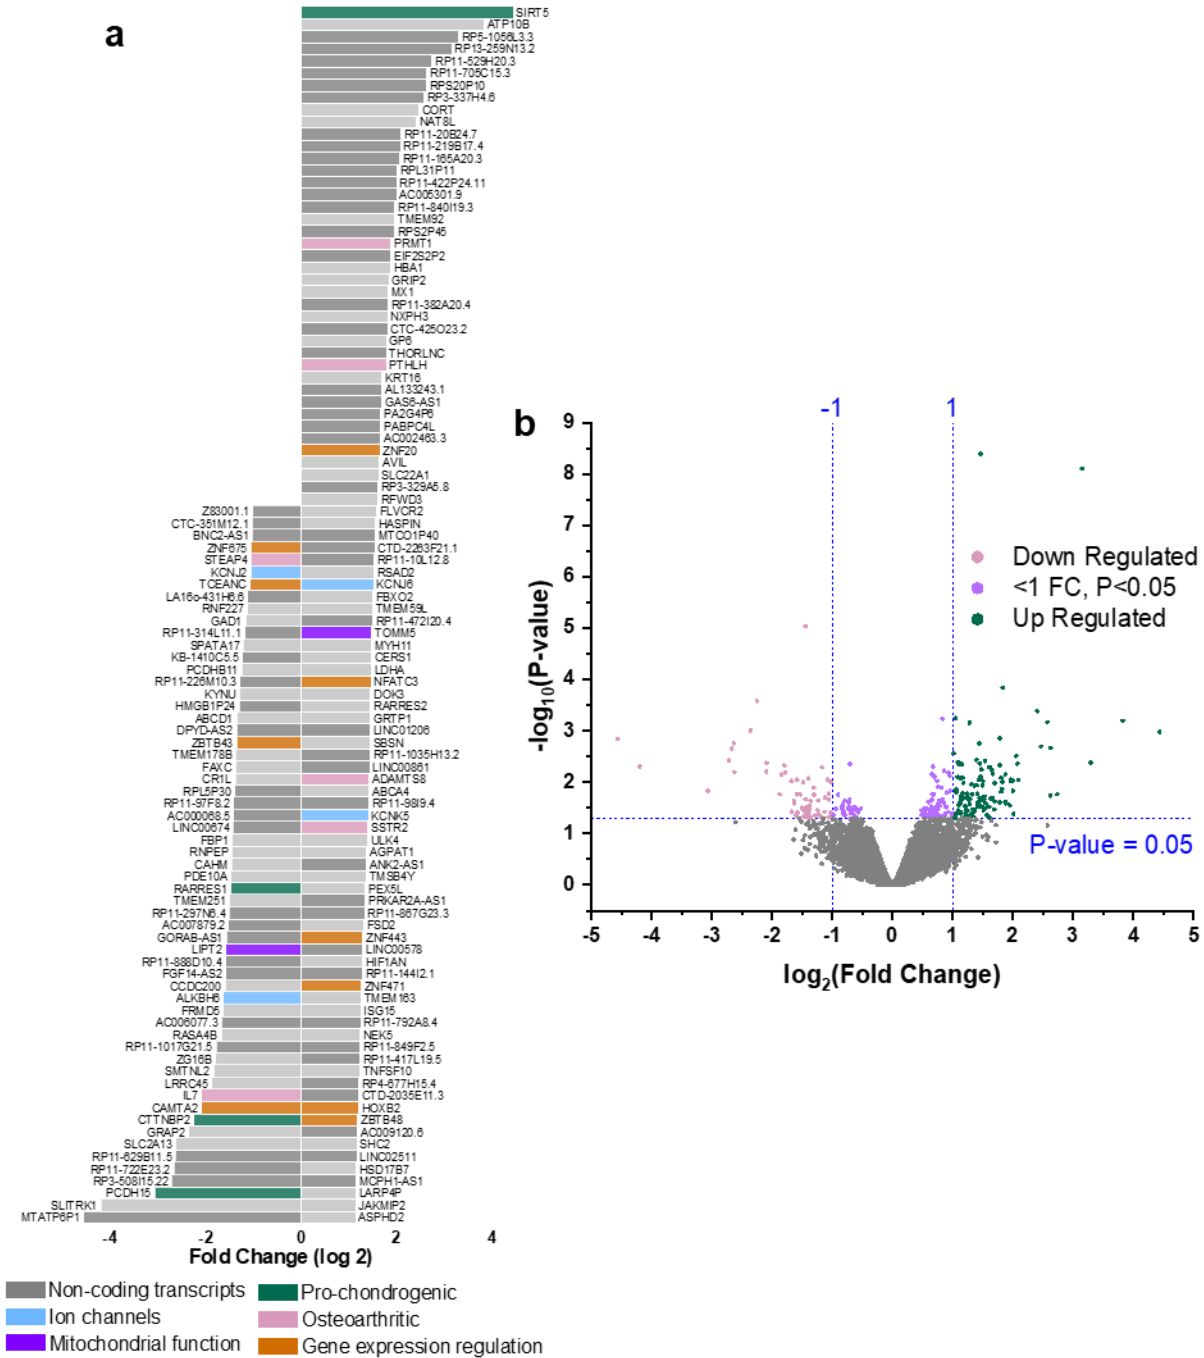

**Fig. S2.**

DEGs in healthy hPCs that were exposed to healthy-like osmolarity. **a**, Stacked-bar graph shows top-100 down and up-regulated genes in healthy hPCs exposed to healthy-like osmolarity as compared to OA-like osmolarity. **b**, volcano plot shows down (red), up (green) and significantly differently expressed (but <1 fold, purple) genes in healthy hPCs exposed to healthy-like osmolarity.

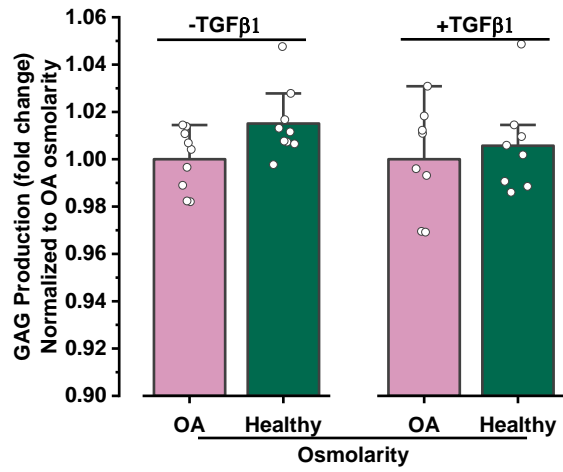

**Fig. S3.**

GAG produced by OA hPCs after 4 days of treatment with OA or healthy-like osmolarity and with or without TGFβ1 (10 ng/ml) as measured by DMMB assay, n = 3 OA donors, 2 biological replicates, per donor.

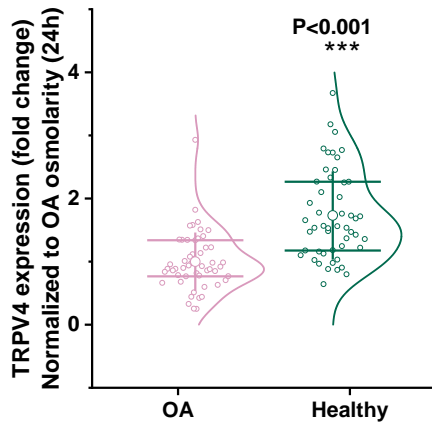

**Fig. S4.**

TRPV4 expression in OA hPCs exposed to OA and healthy-like osmolarities for 24 h. Fluorescence intensity values per cell were normalized to OA-like osmolarity, 1 donor, n = 51 cells, Statistics: t-test, unpaired, \*\*\* $p < 0.001$ .

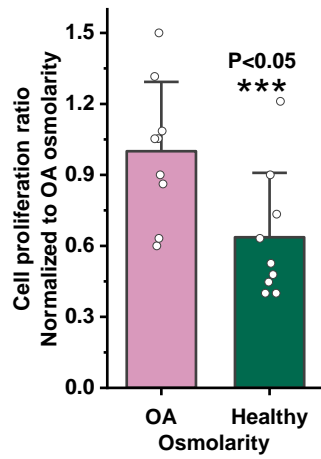

**Fig. S5.**

Proliferation ratio of OA hPCs as they were cultured in OA and healthy-like osmolarities for 8 days,  $n = 3$  donors and 3 biological triplicates per donor. Statistics: t-test, unpaired,  $*p < 0.001$ .

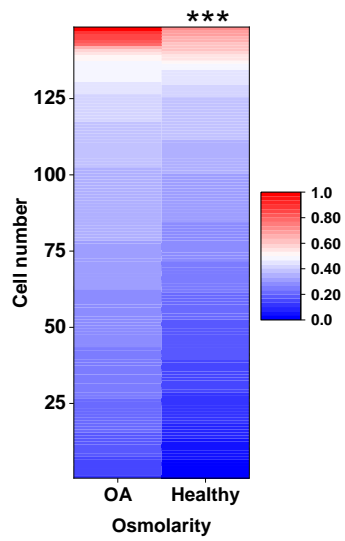

**Fig. S6.**

Heat-map showing ER stress levels in OA hPCs exposed to OA and healthy-like osmolarities,  $n = 2$  donors, 148 cells. Statistics: t-test, unpaired,  $***p < 0.001$ .



**Table S1**

Literature reports on the osmolarity of articular tissue (OA = osteoarthritis, RA = Rheumatoid arthritis, SZ = Superficial Zone, DZ = Deep zone). Related to figure 2b.

| Study | Normal (mOsm)                 | OA (mOsm)     | RA (mOsm)  | Ref  |
|-------|-------------------------------|---------------|------------|------|
| 1     | 404 ±57                       | 297 ±16.9     | 280±7.7    | (2)  |
| 2     | 430                           |               |            | (34) |
| 3     | 350-450                       |               |            | (35) |
| 4     | 310-370, (SZ)<br>370-480 (DZ) |               |            | (36) |
| 5     | 340-410                       |               |            | (25) |
| 6     | 328.9± 41.3                   | 295.6 ± 14.7  | 293 0± 7.2 | (37) |
| 7     | 383 ± 40                      |               |            | (38) |
| 8     |                               | 300           | 306        | (39) |
| 9     |                               | 310.20 ± 5.54 |            | (40) |
| 10    |                               | 281           |            | (41) |
| 11    |                               | 300           |            | (19) |

**Table S2**

Our own measurements of osmolarity of Synovial fluid collected from OA knee joint. Related to figure 2b.

| Donors | Gender | Age | Osmolarity (mOsm) |
|--------|--------|-----|-------------------|
| 1      | M      | 69  | 282               |
| 2      | F      | 72  | 294               |
| 3      | M      | 69  | 306               |
| 4      | F      | 67  | 296               |
| 5      | F      | 76  | 304               |
| 6      | M      | 75  | 306               |
| 7      | M      | 68  | 326               |
| 8      | F      | 82  | 298               |
| 9      | M      | 67  | 286               |
| 10     | F      | 73  | 300               |
| 11     | M      | 73  | 289               |
| 12     | F      | 67  | 314               |
| 13     | M      | 66  | 286               |
| 14     | M      | 70  | 280               |

**Table S3**

Literature reports on effects of hypo or hyper osmolar irrigation solution in chondrocyte survival and function.

| Study | OA/Healthy | Osmolarity (mOsm) | Description                                                                                                                  | Ref |
|-------|------------|-------------------|------------------------------------------------------------------------------------------------------------------------------|-----|
| 1     | OA         | 180, 280          | Chondrocytes in cartilage explants released higher lactose dehydrogenase (LDH), higher indicating cell injury/damage.        | 26  |
|       | Healthy    | 380               | Chondrocytes in cartilage explants released Lower LDH, indicating less cell injury/damage.                                   |     |
| 2     | OA         | 273               | Post operative pain was higher in patients.                                                                                  | 27  |
|       | Healthy    | 593               | Post operative pain was lower in patients. Significantly less weight gain in the shoulder girth.                             |     |
| 3     | OA         | 300               | Higher expression of pro-inflammatory cytokines and MMPs by chondrocytes.                                                    | 28  |
|       | Healthy    | 600               | Lower expression of pro-inflammatory cytokines and MMPs by chondrocytes.                                                     |     |
| 4     | OA         | 100, 255, 285     | Higher chondrocyte cell death.                                                                                               | 29  |
|       | Healthy    | 500, 600          | Lower chondrocyte cell death.                                                                                                |     |
| 5     | OA         | 180, 280          | Higher chondrocyte cell death, higher elution of proteoglycans from cartilage explant, lower expression of type II collagen. | 30  |
|       | Healthy    | 380, 580          | Lower chondrocyte cell death, lower elution of proteoglycans from cartilage explant, higher expression of type II collagen.  |     |
| 6     | OA         | 285               | Applying lower osmolarity irrigation solution resulted in a higher chondrocyte cell death at the injured site                | 31  |
|       | Healthy    | 600               | Applying higher osmolarity irrigation solution resulted in a Lower chondrocyte cell death at the injured site                |     |
| 7     | OA         | 300               | Expression of IL1 $\beta$ and IL-6 were higher in the cartilage tissue exposed to lower osmolarity.                          | 32  |
|       | Healthy    | 400               | Expression of IL1 $\beta$ and IL-6 were lower in the cartilage tissue exposed to lower osmolarity.                           |     |
| 8     | OA         | 280               | Lower TGF $\beta$ , BMP, COL2A expression                                                                                    | 33  |
|       | Healthy    | 380               | Higher TGF $\beta$ , BMP, COL2A expression                                                                                   |     |

**Table S4**

Details of donors used in this study.

| Sl. No | Gender | Age | Health state | Lab reference |
|--------|--------|-----|--------------|---------------|
| 1      | Female | 48  | Healthy      | H-1461        |
| 2      | Male   | 32  | Healthy      | H-1463        |
| 3      | Male   | 48  | Healthy      | H-1466        |
| 4      | Male   | 63  | Healthy      | H-1435        |
| 5      | Female | 73  | Healthy      | H-1441        |
| 6      | Female | 66  | Healthy      | H-1485        |
| 7      | Female | 70  | OA           | D220A         |
| 8      | Female | 64  | OA           | D420A         |
| 9      | Male   | 61  | OA           | D670A         |
| 10     | Female | 72  | OA           | D1430A        |
| 11     | Female | 66  | OA           | D1220A        |
| 12     | Female | 66  | OA           | D970A         |
| 13     | -      | -   | OA           | D320A         |
| 14     | -      | -   | OA           | D790A         |

**Table S5**

Primer sequences.

| Primer | F/R | Sequence                     |
|--------|-----|------------------------------|
| ACAN   | For | 5' AGGCAGCGTGATCCTTACC 3'    |
|        | Rev | 5' GGCCTCTCCAGTCTCATTCTC 3'  |
| COL1   | For | 5' GTCACCCACCGACCAAGAAACC 3' |
|        | Rev | 5' AAGTCCAGGCTGTCCAGGGATG 3' |
| COL2A  | For | 5' CCAGATGACCTTCCTACGCC 3'   |
|        | Rev | 5' TTCAGGGCAGTGTACGTGAAC 3'  |
| TRPV4  | For | 5' CCCGTGAGAACACCAAGTTT 3'   |
|        | Rev | 5' TCACTCCAGGGCATTCTTC 3'    |
| MMP3   | For | 5' TGGCATTTCAGTCCCTCTATGG 3' |
|        | Rev | 5' AGGACAAAGCAGGATCACAGTT 3' |
| MMP13  | For | 5' AAGGAGCATGGCGACTTCT 3'    |
|        | Rev | 5' TGGCCCAGGAGGAAAAGC 3'     |
| ALPL   | For | 5' ACAAGCACTCCCCTTCATC 3'    |
|        | Rev | 5' TTCAGCTCGTACTGCATGTC 3'   |
| RPL13  | For | 5' AAAAAGCGGATGGTGGTTC 3'    |
|        | Rev | 5' CTCCGGTAGTGGATCTTGG 3'    |
